# Supplementary material for: Implementation of disease activity measurement for rheumatoid arthritis patients in an academic rheumatology clinic
Source: PubMed Central journal article supplement (PMC4986364; doi:10.1186/s12913-016-1633-x), 2016-08-15
Supplement: 12913_2016_1633_MOESM3_ESM.pdf [file 12913_2016_1633_MOESM3_ESM.pdf]

APPENDIX 3: Cycle 2 provider form

Patient Name: \_\_\_\_\_  
 Last 4: \_\_\_\_\_  
 Date: \_\_\_\_\_

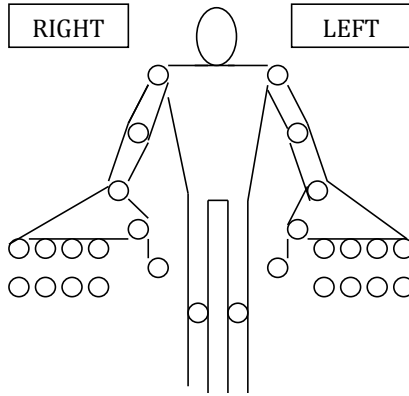

Tender = Swollen = Tender & Swollen =  No tender joints  
 No swollen joints

| Provider Global Assessment of Disease Activity |   |     |     |     |     |     |     |     |     |     |     |     |     |     |     |     |     |     |     |     |    |      |
|------------------------------------------------|---|-----|-----|-----|-----|-----|-----|-----|-----|-----|-----|-----|-----|-----|-----|-----|-----|-----|-----|-----|----|------|
| Very Well                                      | 0 | 0.5 | 1.0 | 1.5 | 2.0 | 2.5 | 3.0 | 3.5 | 4.0 | 4.5 | 5.0 | 5.5 | 6.0 | 6.5 | 7.0 | 7.5 | 8.0 | 8.5 | 9.0 | 9.5 | 10 | Poor |

**CDAI:** Tender and swollen joint counts (include MCPs, PIPs, wrists, elbows, shoulders and knees only), patient and provider global scores (this is calculated in cm), labs are not needed. Calculate below and put value into note.

**How to Score the CDAI**

| Variable                                                | Range         | Value |
|---------------------------------------------------------|---------------|-------|
| Tender joint score                                      | (0-28)        |       |
| Swollen joint score                                     | (0-28)        |       |
| Patient global score                                    | (0-10)        |       |
| Provider global score                                   | (0-10)        |       |
| <b>Add the above values to calculate the CDAI score</b> | <b>(0-76)</b> |       |

| CDAI Score Interpretation |                   |
|---------------------------|-------------------|
| 0.0 – 2.8                 | Remission         |
| 2.9 – 10.0                | Low Activity      |
| 10.1 – 22.0               | Moderate Activity |
| 22.1 – 76.0               | High Activity     |

**DAS28:** Tender and swollen joint counts (include MCPs, PIPs, wrists, elbows, shoulders and knees only), patient global score (this is calculated in mm), ESR or CRP. Use free app to calculate DAS28 (“DAS28 Calculator”) and put value into note.

| Response Table       |           | Changes in DAS 28 From Baseline |           |       |
|----------------------|-----------|---------------------------------|-----------|-------|
|                      |           | >1.2                            | 0.6 – 1.2 | < 0.6 |
| Current Value DAS 28 | < 3.2     | good                            | moderate  | poor  |
|                      | 3.2 – 5.1 | moderate                        | moderate  | poor  |
|                      | > 5.1     | moderate                        | poor      | poor  |
