# Supplementary material for: Implementation of disease activity measurement for rheumatoid arthritis patients in an academic rheumatology clinic
Source: Springer Nature journal article supplement (doi:10.1186/s12913-016-1633-x), 2016-08-15
Supplement: MOESM1 [file 10584958]

APPENDIX 1: PDSA Cycle 1 Form

**PATIENT TO FILL OUT FRONT HALF**

Considering all the ways that your arthritis affects you, rate how you are doing on the following scale by placing a vertical mark (|) on the line

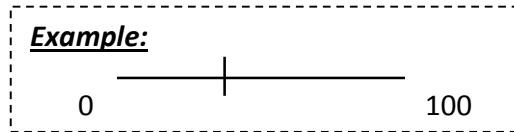

Very Well Very Poor

0 100

---

**PHYSICIAN TO FILL OUT**

Physician global assessment of patient disease activity

Very Well Very Poor

0 100

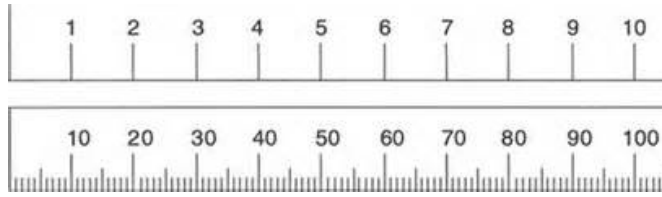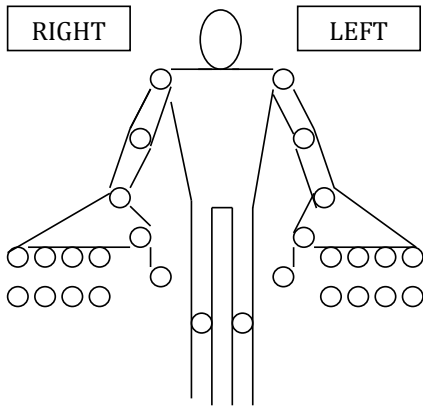

Notes:

Tender = Swollen = Tender & Swollen =

- No tender joints
- No swollen joints

**CDAI:** Tender and swollen joint counts (include MCPs, PIPs, wrists, elbows, shoulders and knees only), patient and provider global scores (this is calculated in cm), labs are not needed. Calculate below and put value into note.

**How to Score the CDAI**

| Variable                                                | Range         | Value |
|---------------------------------------------------------|---------------|-------|
| Tender joint score                                      | (0-28)        |       |
| Swollen joint score                                     | (0-28)        |       |
| Patient global score                                    | (0-10)        |       |
| Provider global score                                   | (0-10)        |       |
| <b>Add the above values to calculate the CDAI score</b> | <b>(0-76)</b> |       |

| CDAI Score Interpretation |                   |
|---------------------------|-------------------|
| 0.0 – 2.8                 | Remission         |
| 2.9 – 10.0                | Low Activity      |
| 10.1 – 22.0               | Moderate Activity |
| 22.1 – 76.0               | High Activity     |

**DAS28:** Tender and swollen joint counts (include MCPs, PIPs, wrists, elbows, shoulders and knees only), patient global score (this is calculated in mm), ESR or CRP. Use free app to calculate DAS28 (“DAS28 Calculator”) and put value into note.

| Response Table             | Changes in DAS 28 From Baseline |           |       |
|----------------------------|---------------------------------|-----------|-------|
|                            | >1.2                            | 0.6 – 1.2 | < 0.6 |
| Current Value DAS 28 < 3.2 | good                            | moderate  | poor  |
| 3.2 – 5.1                  | moderate                        | moderate  | poor  |
| > 5.1                      | moderate                        | poor      | poor  |
