# Supplementary material for: Implementation of disease activity measurement for rheumatoid arthritis patients in an academic rheumatology clinic
Source: Springer Nature journal article supplement (doi:10.1186/s12913-016-1633-x), 2016-08-15
Supplement: MOESM2 [file 10584958]

## VA Patient Global Assessment

Patient Name: \_\_\_\_\_

Last four: \_\_\_\_\_

Date: \_\_\_\_\_

Considering all of the ways your arthritis affects you, rate how well you are doing on the following scale:

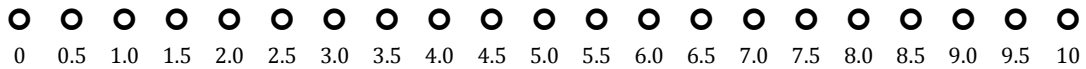

Very Well

Very Poor
